# Supplementary material for: Construction and analysis of a joint diagnosis model of random forest and artificial neural network for heart failure
Source: Aging (Albany NY). 2020 Dec 26;12(24):26221–35. doi: 10.18632/aging.202405 (PMC7803554; doi:10.18632/aging.202405)
Supplement: Supplementary File 1 [file aging-12-202405-s002.xlsx]

## Sheet: SupplementFiles1.csv
Supplementary File 1. 281 significant DEGs related to HF diseases.
	logFC	AveExpr	t	P.Value	adj.P.Val	B	v	g	name
SERPINA3	2.63909	7.05933	24.4632	8.0852e-75	1.52172e-70	159.596	74.0923	up	SERPINA3
PLA2G2A	1.89045	7.98553	13.9703	7.49841e-35	1.05319e-32	68.4527	34.125	up	PLA2G2A
ASPN	-1.82276	7.5649	-17.8056	1.4518e-49	1.70777e-46	102.029	48.8381	down	ASPN
FCN3	1.7869	8.00935	21.0543	4.67378e-62	2.19913e-58	130.523	61.3303	up	FCN3
SFRP4	-1.7769	4.97188	-16.6359	4.81988e-45	2.59185e-42	91.7111	44.317	down	SFRP4
IL1RL1	1.75892	5.83798	17.0997	7.78706e-47	5.86241e-44	95.7999	46.1086	up	IL1RL1
NPPA	-1.73271	7.49593	-7.76381	1.16341e-13	1.11954e-12	20.2345	12.9343	down	NPPA
MYH6	1.57928	10.121	14.714	1.14537e-37	2.34315e-35	74.8781	36.9411	up	MYH6
HBB	-1.55513	7.68303	-9.15499	7.04656e-18	1.11075e-16	29.7932	17.152	down	HBB
CD163	1.52004	7.42487	16.6784	3.3016e-45	1.82763e-42	92.0861	44.4813	up	CD163
SERPINE1	1.49734	6.96835	9.40651	1.10375e-18	1.93784e-17	31.6216	17.9571	up	SERPINE1
LYVE1	1.43473	9.10381	14.7048	1.24193e-37	2.51336e-35	74.7979	36.9059	up	LYVE1
SLCO4A1	1.36131	6.51564	18.4394	5.14991e-52	7.45588e-49	107.619	51.2882	up	SLCO4A1
FRZB	-1.35684	5.99723	-17.303	1.27488e-47	1.19973e-44	97.5934	46.8945	down	FRZB
EIF1AY	-1.3508	8.25766	-4.4511	1.18695e-05	4.09374e-05	2.2987	4.92557	down	EIF1AY
OGN	-1.32219	7.6824	-15.8436	5.44757e-42	1.79875e-39	84.7431	41.2638	down	OGN
VSIG4	1.29918	7.11964	16.0049	1.305e-42	4.96573e-40	86.1594	41.8844	up	VSIG4
CYP4B1	1.27463	6.99902	11.5844	4.31514e-26	1.86273e-24	48.4779	25.365	up	CYP4B1
AREG	1.24773	6.25521	8.87033	5.55161e-17	7.76277e-16	27.7586	16.2556	up	AREG
LUM	-1.23123	9.67285	-18.2458	2.88334e-51	3.61782e-48	105.912	50.5401	down	LUM
MXRA5	-1.22317	7.41722	-13.3293	1.88405e-32	1.7909e-30	62.9774	31.7249	down	MXRA5
ADAMTS4	1.19129	5.98553	13.5458	2.93629e-33	3.23181e-31	64.8189	32.5322	up	ADAMTS4
MIR208A	1.18869	4.82529	10.2525	1.78514e-21	4.45598e-20	37.9668	20.7483	up	MIR208A
SMOC2	-1.18552	7.0527	-20.4988	6.1617e-60	1.93282e-56	125.69	59.2103	down	SMOC2
ADAMTS9	1.17179	8.12717	15.3866	3.09244e-40	8.31469e-38	80.7399	39.5097	up	ADAMTS9
AOX1	1.17022	5.3432	11.6442	2.6439e-26	1.15723e-24	48.9626	25.5778	up	AOX1
RNASE2	1.16406	4.23124	15.3642	3.76632e-40	9.98392e-38	80.5445	39.4241	up	RNASE2
MGST1	1.14015	7.20085	10.0775	6.90215e-21	1.59198e-19	36.6309	20.161	up	MGST1
HMGCS2	1.1275	6.33402	6.50736	3.00704e-10	1.9382e-09	12.5391	9.52186	up	HMGCS2
IFI44L	-1.12064	7.17778	-15.4031	2.67331e-40	7.39918e-38	80.8843	39.573	down	IFI44L
ANKRD2	1.09337	9.2172	11.605	3.6442e-26	1.58036e-24	48.6451	25.4384	up	ANKRD2
USP9Y	-1.08867	6.54328	-5.42187	1.17545e-07	5.3785e-07	6.73649	6.9298	down	USP9Y
METTL7B	1.07524	7.31063	12.5856	1.05033e-29	6.84022e-28	56.7145	28.9787	up	METTL7B
MYOT	1.07219	7.15923	12.766	2.28742e-30	1.6817e-28	58.224	29.6407	up	MYOT
ACKR4	-1.07124	6.60278	-13.6431	1.26892e-33	1.46517e-31	65.6501	32.8966	down	ACKR4
PHLDA1	-1.06625	6.59109	-14.5931	3.30211e-37	6.47386e-35	73.8288	36.4812	down	PHLDA1
MNS1	-1.06154	4.75265	-20.9241	1.46445e-61	5.51248e-58	129.393	60.8343	down	MNS1
FREM1	-1.05464	5.60942	-22.7484	1.85614e-68	1.16448e-64	145.111	67.7314	down	FREM1
SFRP1	-1.03453	6.99462	-12.0307	1.08974e-27	5.66574e-26	52.1187	26.9627	down	SFRP1
FNDC1	-1.02654	5.45072	-17.017	1.62505e-46	1.05466e-43	95.0708	45.7891	down	FNDC1
PI16	-1.02228	6.96442	-11.9709	1.78851e-27	9.00041e-26	51.6283	26.7475	down	PI16
PDE5A	-1.01901	6.46441	-18.4279	5.70895e-52	7.67486e-49	107.517	51.2434	down	PDE5A
HAPLN1	-1.01714	4.2299	-9.94966	1.84035e-20	4.02759e-19	35.6624	19.7351	down	HAPLN1
MME	-1.01542	6.43845	-14.0747	3.02914e-35	4.38549e-33	69.3509	34.5187	down	MME
S100A8	1.00904	6.97474	8.79857	9.2857e-17	1.26276e-15	27.2518	16.0322	up	S100A8
C6	-1.00546	8.52395	-8.82493	7.68923e-17	1.05327e-15	27.4377	16.1141	down	C6
ECM2	-1.00043	6.19524	-18.8311	1.58382e-53	2.98091e-50	111.069	52.8003	down	ECM2
PTN	-0.998262	5.74996	-16.7534	1.69501e-45	9.66723e-43	92.7469	44.7708	down	PTN
C1QTNF1	0.994155	8.42847	14.9484	1.4651e-38	3.32225e-36	76.9161	37.8341	up	C1QTNF1
NRK	-0.993419	5.29415	-17.1441	5.24116e-47	4.48381e-44	96.1923	46.2806	down	NRK
DSC1	-0.993351	6.59861	-9.60538	2.50006e-19	4.71952e-18	33.0868	18.602	down	DSC1
ANPEP	0.991873	5.51262	12.6407	6.59544e-30	4.43331e-28	57.1753	29.1808	up	ANPEP
NAP1L3	-0.988809	5.61699	-13.3322	1.83855e-32	1.76548e-30	63.0017	31.7355	down	NAP1L3
FCER1G	0.987173	6.79876	12.1287	4.82418e-28	2.64143e-26	52.9254	27.3166	up	FCER1G
SGPP2	0.984918	6.28411	9.88544	3.00471e-20	6.43364e-19	35.1783	19.5222	up	SGPP2
PI15	0.980524	3.75598	9.59226	2.75873e-19	5.19739e-18	32.9897	18.5593	up	PI15
ALOX5AP	0.970363	7.27484	12.5867	1.04031e-29	6.79852e-28	56.724	28.9828	up	ALOX5AP
RARRES1	0.961354	5.4702	11.0444	3.43459e-24	1.20827e-22	44.1481	23.4641	up	RARRES1
AQP3	0.960641	6.46912	15.2555	9.8236e-40	2.4652e-37	79.5944	39.0077	up	AQP3
TLL2	-0.950853	5.89163	-15.2674	8.84498e-40	2.24961e-37	79.6984	39.0533	down	TLL2
CNN1	0.950796	9.04778	11.9353	2.4022e-27	1.18666e-25	51.3363	26.6194	up	CNN1
GUCA1C	-0.950065	5.59156	-7.38598	1.36398e-12	1.17061e-11	17.8188	11.8652	down	GUCA1C
CCL2	0.948275	8.34143	7.1953	4.57866e-12	3.68584e-11	16.6318	11.3393	up	CCL2
SPP1	0.94818	6.61903	6.98308	1.71787e-11	1.2938e-10	15.337	10.765	up	SPP1
PTX3	0.94539	4.86547	7.39745	1.26729e-12	1.09461e-11	17.8909	11.8971	up	PTX3
IL1R2	0.937467	5.32652	10.8633	1.46264e-23	4.69768e-22	42.7153	22.8349	up	IL1R2
DDX3Y	-0.925061	6.33641	-4.42888	1.30805e-05	4.47941e-05	2.206	4.88338	down	DDX3Y
LCN6	0.917414	5.63322	18.5785	1.49548e-52	2.55876e-49	108.844	51.8252	up	LCN6
PLEKHH2	-0.913348	5.72721	-14.1947	1.06756e-35	1.64692e-33	70.3843	34.9716	down	PLEKHH2
UTY	-0.905869	6.28571	-4.43514	1.27279e-05	4.36821e-05	2.23206	4.89524	down	UTY
ASB14	-0.903776	7.67094	-7.20392	4.33672e-12	3.50909e-11	16.685	11.3628	down	ASB14
GALNT15	0.898809	6.1393	9.65312	1.74611e-19	3.36028e-18	33.441	18.7579	up	GALNT15
FMOD	-0.894958	6.87307	-9.5187	4.78529e-19	8.76109e-18	32.4461	18.3201	down	FMOD
LINC00670	-0.893066	5.17277	-13.2613	3.37311e-32	3.12735e-30	62.4005	31.472	down	LINC00670
TTTY10	-0.891581	5.33596	-6.04674	4.17877e-09	2.32344e-08	9.97433	8.37895	down	TTTY10
CRISPLD1	-0.889574	4.17149	-13.4453	6.96545e-33	7.12483e-31	63.9632	32.1571	down	CRISPLD1
CRYM	-0.888398	7.50917	-12.9061	6.97562e-31	5.56305e-29	59.4001	30.1564	down	CRYM
STAT4	-0.887124	5.72153	-8.33315	2.45833e-15	2.86314e-14	24.0262	14.6094	down	STAT4
SCN2B	-0.884945	6.06865	-16.9935	2.00325e-46	1.21623e-43	94.8634	45.6983	down	SCN2B
SHISA3	0.883843	6.40245	10.1623	3.58989e-21	8.56342e-20	37.2766	20.4449	up	SHISA3
OMD	-0.883384	6.68068	-10.9571	6.91419e-24	2.3363e-22	43.4562	23.1603	down	OMD
MATN2	-0.883307	5.89951	-17.1347	5.69992e-47	4.66427e-44	96.1092	46.2441	down	MATN2
OLFML1	-0.883002	5.82995	-13.9593	8.24467e-35	1.14943e-32	68.3587	34.0838	down	OLFML1
MFAP4	-0.881762	8.01383	-13.5159	3.7959e-33	4.08244e-31	64.5645	32.4207	down	MFAP4
NEB	-0.877613	5.96419	-6.10448	3.02809e-09	1.71506e-08	10.2878	8.51883	down	NEB
TMEM71	-0.877366	8.19685	-12.7917	1.84057e-30	1.37466e-28	58.4392	29.735	down	TMEM71
GFPT2	0.876729	6.49063	10.4884	2.83355e-22	7.76276e-21	39.7855	21.5477	up	GFPT2
LAPTM5	0.874601	7.94035	11.3244	3.58917e-25	1.41915e-23	46.3821	24.445	up	LAPTM5
SLC16A9	-0.872542	4.21035	-16.2509	1.47265e-43	6.92919e-41	88.3218	42.8319	down	SLC16A9
RGS4	-0.86971	4.90025	-10.2854	1.38282e-21	3.48875e-20	38.2191	20.8592	down	RGS4
C1orf105	0.868015	4.83995	11.5167	7.50463e-26	3.18837e-24	47.9303	25.1247	up	C1orf105
C1orf162	0.868	7.01353	13.4753	5.38276e-33	5.65972e-31	64.2185	32.269	up	C1orf162
CHRDL1	-0.867448	6.0843	-6.80579	5.07597e-11	3.5848e-10	14.2771	10.2945	down	CHRDL1
MT1A	0.864139	7.85884	9.28895	2.63435e-18	4.38771e-17	30.7635	17.5793	up	MT1A
LRRC17	-0.860774	5.04083	-12.0639	8.26956e-28	4.3597e-26	52.3919	27.0825	down	LRRC17
TUBA3E	0.857905	4.57848	17.0432	1.2865e-46	8.96788e-44	95.3023	45.8906	up	TUBA3E
NPTX2	0.856335	5.62983	16.6137	5.86796e-45	3.0678e-42	91.5161	44.2315	up	NPTX2
ECRP	0.850025	4.40938	14.4654	1.00765e-36	1.7399e-34	72.7232	35.9967	up	ECRP
LTBP2	-0.838134	8.11854	-9.68415	1.38203e-19	2.70106e-18	33.6718	18.8595	down	LTBP2
SLC11A1	0.835395	5.15512	12.1442	4.24083e-28	2.34755e-26	53.0529	27.3725	up	SLC11A1
NPR3	-0.834218	7.84445	-10.5154	2.29411e-22	6.36834e-21	39.9942	21.6394	down	NPR3
MEDAG	0.833412	6.86683	9.57535	3.13188e-19	5.84772e-18	32.8645	18.5042	up	MEDAG
SCUBE2	-0.831735	4.75479	-15.5622	6.55967e-41	1.99128e-38	82.2768	40.1831	down	SCUBE2
PLIN2	0.831375	7.95637	12.2263	2.13815e-28	1.20486e-26	53.7309	27.67	up	PLIN2
GGT5	0.830097	6.91342	18.4969	3.08811e-52	4.84345e-49	108.126	51.5103	up	GGT5
CSDC2	0.828483	8.65144	17.4441	3.62783e-48	3.59365e-45	98.839	47.4404	up	CSDC2
THBS4	-0.824252	8.09726	-9.19635	5.20492e-18	8.3728e-17	30.0919	17.2836	down	THBS4
SULF1	-0.823331	7.05512	-11.4459	1.33622e-25	5.58865e-24	47.3596	24.8741	down	SULF1
IGSF10	-0.823168	5.1975	-10.3535	8.13899e-22	2.10129e-20	38.7428	21.0894	down	IGSF10
POSTN	-0.820951	8.16895	-6.14409	2.42462e-09	1.38873e-08	10.5041	8.61536	down	POSTN
ISLR	-0.820469	6.24951	-17.1241	6.26516e-47	4.91319e-44	96.0155	46.2031	down	ISLR
CHRDL2	0.812249	4.9693	9.05016	1.51351e-17	2.27159e-16	29.0395	16.82	up	CHRDL2
ITIH5	-0.811202	6.9571	-17.6904	4.04889e-49	4.4826e-46	101.012	48.3927	down	ITIH5
MT1X	0.810975	9.17605	10.3689	7.2164e-22	1.87338e-20	38.8617	21.1417	up	MT1X
TIMP1	0.809678	9.95654	9.77983	6.7049e-20	1.35837e-18	34.3858	19.1736	up	TIMP1
CD14	0.80882	8.07105	9.46046	7.38949e-19	1.32329e-17	32.0174	18.1314	up	CD14
GLT8D2	-0.798094	7.39473	-15.4078	2.5649e-40	7.20508e-38	80.9253	39.5909	down	GLT8D2
ATRNL1	-0.797785	5.14601	-7.20861	4.2104e-12	3.41421e-11	16.714	11.3757	down	ATRNL1
TENT5B	0.796838	6.24956	15.1319	2.9167e-39	7.03785e-37	78.5158	38.5351	up	TENT5B
PLCE1	-0.796414	8.59661	-12.9054	7.01452e-31	5.57048e-29	59.3946	30.154	down	PLCE1
RPS4Y1	-0.79552	6.22404	-4.05302	6.37507e-05	0.000197702	0.700631	4.19552	down	RPS4Y1
RASL11B	-0.794658	5.99419	-10.6714	6.70824e-23	1.98515e-21	41.2095	22.1734	down	RASL11B
DPT	-0.791561	8.38076	-12.0657	8.14298e-28	4.31715e-26	52.4071	27.0892	down	DPT
PROM1	-0.789807	6.18686	-9.56905	3.28328e-19	6.11223e-18	32.8179	18.4837	down	PROM1
F13A1	0.785825	9.10149	9.17889	5.91557e-18	9.41141e-17	29.9657	17.228	up	F13A1
CCDC113	-0.783971	5.63183	-16.5324	1.2086e-44	5.98605e-42	90.7999	43.9177	down	CCDC113
CTSK	-0.78048	6.8998	-11.8959	3.32594e-27	1.6217e-25	51.0143	26.4781	down	CTSK
MT1M	0.779293	7.37917	6.87081	3.41918e-11	2.4774e-10	14.6635	10.4661	up	MT1M
KDM5D	-0.777733	6.21578	-4.43078	1.29725e-05	4.44486e-05	2.2139	4.88698	down	KDM5D
CTSC	0.774363	7.34852	9.49084	5.89215e-19	1.06528e-17	32.2408	18.2297	up	CTSC
HAS2	0.773304	5.46771	8.0081	2.27069e-14	2.369e-13	21.8398	13.6438	up	HAS2
ETNK2	0.770034	5.04833	12.8805	8.66663e-31	6.79645e-29	59.1851	30.0621	up	ETNK2
BEX1	-0.768995	5.2847	-9.82505	4.75742e-20	9.87204e-19	34.7246	19.3226	down	BEX1
SLCO2A1	0.765769	7.64279	10.4873	2.85879e-22	7.82055e-21	39.7767	21.5438	up	SLCO2A1
LRRC10	-0.762286	7.05899	-8.30512	2.9843e-15	3.4501e-14	23.8354	14.5252	down	LRRC10
TIMP4	0.750153	8.46012	10.9929	5.19415e-24	1.78392e-22	43.739	23.2845	up	TIMP4
GSTM5	-0.749608	5.78038	-10.2819	1.42076e-21	3.57488e-20	38.1923	20.8475	down	GSTM5
S100A9	0.749156	6.27723	12.1335	4.63303e-28	2.55714e-26	52.9654	27.3341	up	S100A9
PLTP	0.747211	8.68341	10.0148	1.11721e-20	2.5152e-19	36.1553	19.9519	up	PLTP
GATM	-0.741616	8.01059	-10.1948	2.79199e-21	6.7804e-20	37.5249	20.5541	down	GATM
ATP1B3	0.740663	6.82316	11.025	4.01524e-24	1.39946e-22	43.9936	23.3963	up	ATP1B3
CCR1	0.738614	4.82451	10.2174	2.34376e-21	5.75873e-20	37.6978	20.6301	up	CCR1
LMCD1	0.738597	7.14518	8.48177	8.73635e-16	1.06909e-14	25.0443	15.0587	up	LMCD1
ARG2	0.738249	5.06908	8.43507	1.21071e-15	1.45788e-14	24.7232	14.917	up	ARG2
CXCL10	-0.73781	3.94904	-5.18497	3.87052e-07	1.65336e-06	5.58509	6.41223	down	CXCL10
SERPINB8	0.736213	5.85802	10.6196	1.00973e-22	2.91923e-21	40.8053	21.9958	up	SERPINB8
ZMAT1	-0.733367	6.75263	-19.6536	1.07404e-56	2.88778e-53	118.297	55.969	down	ZMAT1
ENAM	-0.733353	6.43094	-9.84776	4.00308e-20	8.35277e-19	34.895	19.3976	down	ENAM
ANOS1	-0.729824	6.22626	-15.0646	5.27281e-39	1.21024e-36	77.929	38.278	down	ANOS1
ITGA5	0.728551	8.4006	11.1698	1.25294e-24	4.69753e-23	45.1454	23.9021	up	ITGA5
TUBA1C	0.72789	6.98941	11.0509	3.26165e-24	1.15607e-22	44.1992	23.4866	up	TUBA1C
SLC27A6	-0.727652	8.22258	-7.81433	8.32048e-14	8.13928e-13	20.5638	13.0799	down	SLC27A6
EPHX2	-0.727041	5.94317	-12.9004	7.32137e-31	5.78973e-29	59.3522	30.1354	down	EPHX2
FGF14	-0.725351	5.0538	-13.9378	9.93816e-35	1.3653e-32	68.1736	34.0027	down	FGF14
OSMR	0.724589	8.16192	12.8288	1.34372e-30	1.03225e-28	58.7508	29.8717	up	OSMR
SLC7A1	0.724059	6.96641	10.7922	2.57478e-23	8.00992e-22	42.1562	22.5893	up	SLC7A1
ETNPPL	0.721936	5.18271	8.35139	2.16652e-15	2.53268e-14	24.1505	14.6642	up	ETNPPL
INSYN1	0.721792	7.36623	14.8765	2.75493e-38	5.89357e-36	76.2903	37.5599	up	INSYN1
SDSL	-0.721214	6.46644	-17.0098	1.73244e-46	1.08687e-43	95.0074	45.7613	down	SDSL
BCL6	0.718762	8.24022	16.1536	3.49046e-43	1.60229e-40	87.4665	42.4571	up	BCL6
TNC	0.718068	6.33877	4.65993	4.67415e-06	1.71921e-05	3.18972	5.3303	up	TNC
SVEP1	-0.717943	6.74427	-11.045	3.41861e-24	1.2049e-22	44.1527	23.4662	down	SVEP1
ABCG2	-0.717886	5.06939	-13.5305	3.34894e-33	3.66456e-31	64.6887	32.4751	down	ABCG2
WNK3	0.717841	3.73585	14.5773	3.78994e-37	7.13306e-35	73.6923	36.4214	up	WNK3
ARRDC3	-0.714287	8.56991	-14.4964	7.69145e-37	1.3529e-34	72.9909	36.114	down	ARRDC3
FLJ34503	-0.711241	5.64413	-6.64331	1.3466e-10	8.98418e-10	13.3236	9.87076	down	FLJ34503
IFI30	0.709947	7.4975	8.84399	6.70698e-17	9.26134e-16	27.5723	16.1735	up	IFI30
UCHL1	-0.709856	6.06369	-8.6199	3.30736e-16	4.21733e-15	26.0007	15.4805	down	UCHL1
C1QB	0.707716	7.93373	8.98061	2.50638e-17	3.66531e-16	28.5423	16.601	up	C1QB
SLC6A1	-0.707598	5.59265	-13.214	5.05647e-32	4.57537e-30	61.9995	31.2962	down	SLC6A1
ALOX5	0.703771	6.09508	11.3867	2.16353e-25	8.79476e-24	46.8828	24.6648	up	ALOX5
RNU4-2	-0.703157	6.92703	-4.53231	8.29494e-06	2.93622e-05	2.64092	5.08119	down	RNU4-2
CPM	0.703056	7.38979	7.7638	1.1635e-13	1.11954e-12	20.2344	12.9342	up	CPM
NT5E	-0.701491	4.87921	-13.002	3.08661e-31	2.54794e-29	60.2077	30.5105	down	NT5E
LINC00312	0.699961	4.80571	7.7311	1.44431e-13	1.37498e-12	20.0221	12.8403	up	LINC00312
MSS51	-0.699119	6.1598	-10.1546	3.81022e-21	9.04315e-20	37.2178	20.419	down	MSS51
CREB5	-0.69828	7.60286	-14.4025	1.7459e-36	2.93388e-34	72.1785	35.758	down	CREB5
KCNN3	-0.695454	6.02779	-17.049	1.22272e-46	8.85106e-44	95.3527	45.9127	down	KCNN3
SNCA	-0.69369	7.25228	-12.1658	3.54141e-28	1.97198e-26	53.2314	27.4508	down	SNCA
MOXD1	-0.693152	6.00502	-10.1547	3.80851e-21	9.04315e-20	37.2182	20.4192	down	MOXD1
EDNRB	0.6923	8.01507	13.0641	1.81799e-31	1.55529e-29	60.732	30.7404	up	EDNRB
METTL21EP	-0.691293	7.07802	-7.59483	3.53364e-13	3.23504e-12	19.1438	12.4518	down	METTL21EP
KLHL41	0.690406	8.85325	11.118	1.90211e-24	6.9649e-23	44.7325	23.7208	up	KLHL41
C16orf89	-0.689193	5.65094	-13.6413	1.28907e-33	1.47937e-31	65.6345	32.8897	down	C16orf89
THBS1	0.688806	9.44573	7.29455	2.44422e-12	2.0335e-11	17.2469	11.6119	up	THBS1
EDIL3	-0.68718	8.02887	-6.81463	4.81125e-11	3.41193e-10	14.3295	10.3177	down	EDIL3
PNP	0.68665	5.98997	9.18405	5.69619e-18	9.10084e-17	30.003	17.2444	up	PNP
CD53	0.68584	7.38407	8.77302	1.1146e-16	1.50163e-15	27.0719	15.9529	up	CD53
TXLNGY	-0.685472	5.40127	-4.56331	7.22457e-06	2.57574e-05	2.773	5.14119	down	TXLNGY
C10orf71	-0.684335	8.98956	-8.73195	1.49379e-16	1.97712e-15	26.7835	15.8257	down	C10orf71
FMO4	-0.683927	6.94418	-12.8257	1.37912e-30	1.05087e-28	58.7251	29.8604	down	FMO4
ST6GALNAC3	0.682758	6.46386	14.1455	1.63823e-35	2.4533e-33	69.9599	34.7856	up	ST6GALNAC3
PDE1A	-0.681951	7.44617	-8.18774	6.69122e-15	7.4386e-14	23.0411	14.1745	down	PDE1A
TLR2	0.676459	5.15674	9.14153	7.77588e-18	1.21452e-16	29.6961	17.1093	up	TLR2
SEMA4B	0.676457	5.99042	16.128	4.37946e-43	1.96252e-40	87.2416	42.3586	up	SEMA4B
SAMHD1	0.676346	8.16592	12.1006	6.09338e-28	3.2955e-26	52.6941	27.2151	up	SAMHD1
CHI3L1	0.676099	4.99275	6.19647	1.80425e-09	1.04679e-08	10.7919	8.7437	up	CHI3L1
GNMT	0.675732	4.20819	13.0646	1.81014e-31	1.55529e-29	60.7363	30.7423	up	GNMT
CCL5	-0.674593	5.51488	-10.3413	8.9511e-22	2.29834e-20	38.6488	21.0481	down	CCL5
LAD1	0.669343	5.53158	18.9632	4.8987e-54	1.02443e-50	112.232	53.3099	up	LAD1
HMOX2	0.668352	8.55727	22.8592	7.1406e-69	6.71966e-65	146.056	68.1463	up	HMOX2
FAM83B	0.668039	4.15835	8.45397	1.0611e-15	1.28513e-14	24.853	14.9742	up	FAM83B
BTN3A1	-0.667734	6.38239	-16.1075	5.25154e-43	2.27697e-40	87.0616	42.2797	down	BTN3A1
KLHL13	-0.667354	5.75327	-13.4274	8.12471e-33	8.13379e-31	63.8107	32.0902	down	KLHL13
DIO2	-0.667242	4.47935	-11.0715	2.76377e-24	9.92689e-23	44.363	23.5585	down	DIO2
ITGBL1	-0.664251	5.68274	-10.0552	8.19341e-21	1.87373e-19	36.4615	20.0865	down	ITGBL1
PODN	-0.66372	8.05352	-9.85156	3.88916e-20	8.16029e-19	34.9235	19.4101	down	PODN
HOPX	0.658399	5.24444	11.7115	1.52089e-26	6.91419e-25	49.5098	25.8179	up	HOPX
FPR1	0.657141	4.90866	11.203	9.58542e-25	3.61537e-23	45.4104	24.0184	up	FPR1
TEAD4	0.653872	5.80795	14.5881	3.44761e-37	6.68944e-35	73.7861	36.4625	up	TEAD4
MPP3	0.653595	7.72678	12.0618	8.4118e-28	4.4223e-26	52.375	27.0751	up	MPP3
IFIT2	-0.650925	5.3003	-14.3709	2.29988e-36	3.79703e-34	71.9054	35.6383	down	IFIT2
ARRDC4	0.649449	7.29402	10.3852	6.35762e-22	1.6619e-20	38.9869	21.1967	up	ARRDC4
NUDT7	-0.645057	8.64052	-8.72831	1.53298e-16	2.02757e-15	26.758	15.8145	down	NUDT7
MAPK10	-0.643785	6.10867	-10.4616	3.49759e-22	9.48532e-21	39.5774	21.4562	down	MAPK10
SLC2A1	0.643352	8.55751	12.5415	1.52209e-29	9.74394e-28	56.3472	28.8176	up	SLC2A1
CHL1	0.643083	5.55766	8.39864	1.5604e-15	1.85172e-14	24.4734	14.8068	up	CHL1
FGF1	-0.642277	7.9361	-12.4961	2.22946e-29	1.40808e-27	55.9692	28.6518	down	FGF1
LIPH	-0.641837	3.97907	-12.4922	2.3047e-29	1.45073e-27	55.9364	28.6374	down	LIPH
GPSM2	0.64075	4.747	9.92292	2.2576e-20	4.89519e-19	35.4606	19.6464	up	GPSM2
HSPA2	-0.63965	7.42412	-8.00812	2.27036e-14	2.369e-13	21.8399	13.6439	down	HSPA2
IL18R1	0.63843	4.44781	12.8593	1.03763e-30	8.03672e-29	59.0068	29.984	up	IL18R1
HERC6	-0.638144	6.86221	-12.6976	4.08107e-30	2.82389e-28	57.6506	29.3892	down	HERC6
NREP	-0.636176	8.20029	-9.85907	3.67297e-20	7.74988e-19	34.98	19.435	down	NREP
BLM	0.635384	5.71461	11.0285	3.90426e-24	1.3633e-22	44.0213	23.4085	up	BLM
CCDC80	-0.634365	8.90606	-8.165	7.81814e-15	8.6556e-14	22.8881	14.1069	down	CCDC80
DUSP13	0.633903	5.43153	14.5185	6.33748e-37	1.13598e-34	73.1828	36.1981	up	DUSP13
SLC36A4	0.63334	5.91246	13.8552	2.03225e-34	2.67476e-32	67.4648	33.692	up	SLC36A4
MYOC	-0.632209	4.95352	-7.26496	2.94896e-12	2.42608e-11	17.0629	11.5303	down	MYOC
CYP4Z1	0.62993	3.77437	11.5152	7.59768e-26	3.22063e-24	47.9182	25.1193	up	CYP4Z1
MRC1	0.629746	7.62798	8.03663	1.87237e-14	1.97423e-13	22.0294	13.7276	up	MRC1
GARNL3	-0.626689	7.60087	-14.4485	1.16812e-36	1.98065e-34	72.5768	35.9325	down	GARNL3
CXCL14	-0.626513	5.47281	-6.01271	5.04694e-09	2.77582e-08	9.7907	8.29697	down	CXCL14
CHDH	0.626273	5.04399	10.7547	3.46759e-23	1.06292e-21	41.8619	22.46	up	CHDH
RSAD2	-0.625336	5.16737	-11.1467	1.5094e-24	5.54851e-23	44.9613	23.8212	down	RSAD2
PLP2	0.623786	9.06264	13.8774	1.67643e-34	2.23773e-32	67.6555	33.7756	up	PLP2
CRISPLD2	0.619946	7.34232	11.0165	4.2968e-24	1.48932e-22	43.9266	23.3669	up	CRISPLD2
CGNL1	-0.619245	6.37378	-10.3316	9.65392e-22	2.46201e-20	38.5741	21.0153	down	CGNL1
MID1IP1	0.617136	6.78727	13.2342	4.25642e-32	3.90781e-30	62.1701	31.371	up	MID1IP1
FAM155B	0.614269	6.8991	6.92161	2.50664e-11	1.8472e-10	14.9672	10.6009	up	FAM155B
C3	0.612759	9.68825	6.7842	5.78412e-11	4.05599e-10	14.1494	10.2378	up	C3
C1QTNF7	-0.611668	4.02224	-15.8815	3.89212e-42	1.3081e-39	85.0763	41.4098	down	C1QTNF7
FBXO40	-0.61162	9.40344	-6.71671	8.68413e-11	5.95859e-10	13.7522	10.0613	down	FBXO40
OGDHL	-0.611488	5.4404	-11.7621	1.00333e-26	4.63974e-25	49.9215	25.9986	down	OGDHL
CCDC3	-0.610688	6.51801	-8.46806	9.61579e-16	1.17138e-14	24.9499	15.017	down	CCDC3
CD38	0.610154	6.22284	10.9087	1.01792e-23	3.367e-22	43.0737	22.9923	up	CD38
CD24	-0.609678	4.67297	-4.49892	9.61766e-06	3.36707e-05	2.49955	5.01693	down	CD24
SH3PXD2B	0.608422	6.64144	10.1667	3.47071e-21	8.31072e-20	37.31	20.4596	up	SH3PXD2B
KIAA0040	0.608023	6.83813	13.4334	7.71291e-33	7.80265e-31	63.8622	32.1128	up	KIAA0040
PIK3IP1	-0.607979	6.02239	-11.4358	1.45063e-25	6.02877e-24	47.2783	24.8384	down	PIK3IP1
XRCC4	0.606827	6.4623	8.81819	8.06939e-17	1.10374e-15	27.3901	16.0932	up	XRCC4
NT5DC2	0.604283	8.32365	15.1211	3.20895e-39	7.54946e-37	78.4211	38.4936	up	NT5DC2
STAT3	0.603744	10.4023	15.5446	7.66716e-41	2.25474e-38	82.1221	40.1154	up	STAT3
FURIN	0.603446	6.85156	18.9746	4.42693e-54	1.02443e-50	112.332	53.3539	up	FURIN
CCDC168	-0.602677	3.80766	-11.9553	2.03538e-27	1.01612e-25	51.5003	26.6914	down	CCDC168
IL1R1	0.601813	7.51509	9.04479	1.57372e-17	2.35632e-16	29.0011	16.8031	up	IL1R1
AQP4	0.601731	5.6956	5.23894	2.96097e-07	1.28822e-06	5.84362	6.52857	up	AQP4
C1QC	0.601471	7.67756	8.21852	5.41819e-15	6.06999e-14	23.2487	14.2661	up	C1QC
SLN	-0.600859	5.82694	-4.93473	1.30244e-06	5.18799e-06	4.41618	5.88524	down	SLN
FCGBP	0.600816	4.35839	12.0186	1.20416e-27	6.1922e-26	52.0199	26.9193	up	FCGBP
EDA2R	-0.599598	5.51777	-8.87798	5.25458e-17	7.37484e-16	27.8128	16.2795	down	EDA2R
NTM	-0.598989	5.03582	-12.0187	1.20341e-27	6.1922e-26	52.0205	26.9196	down	NTM
EGR1	-0.598531	8.60917	-5.2709	2.52408e-07	1.10762e-06	5.99777	6.5979	down	EGR1
SESN3	-0.5981	5.91281	-11.0429	3.47808e-24	1.22129e-22	44.1357	23.4587	down	SESN3
LPCAT3	0.597774	9.16067	14.0677	3.22023e-35	4.62656e-33	69.2902	34.4921	up	LPCAT3
SCGN	0.597297	3.61657	8.94419	3.26103e-17	4.69966e-16	28.2829	16.4866	up	SCGN
SIGLEC9	0.597294	4.83312	12.4206	4.20379e-29	2.5605e-27	55.3413	28.3764	up	SIGLEC9
NID1	0.596934	8.87906	14.6528	1.95826e-37	3.9209e-35	74.3466	36.7081	up	NID1
RXRG	-0.596734	5.1853	-9.03296	1.7149e-17	2.55148e-16	28.9164	16.7658	down	RXRG
FZD7	-0.596048	6.69003	-13.0244	2.55108e-31	2.12451e-29	60.3964	30.5933	down	FZD7
FAP	-0.595303	4.30047	-7.0387	1.21791e-11	9.3104e-11	15.6737	10.9144	down	FAP
ZNF676	-0.594697	6.22629	-9.06568	1.35194e-17	2.05201e-16	29.1508	16.869	down	ZNF676
DOK5	-0.594435	7.07903	-6.69031	1.01723e-10	6.90669e-10	13.5976	9.99258	down	DOK5
ADAMTS15	0.593986	6.05336	11.6868	1.86401e-26	8.35298e-25	49.3085	25.7296	up	ADAMTS15
MYH10	-0.591832	7.96492	-13.4225	8.46862e-33	8.43322e-31	63.7696	32.0722	down	MYH10
SAMD12	-0.589867	6.30063	-9.62425	2.16953e-19	4.12036e-18	33.2268	18.6636	down	SAMD12
WNT9A	-0.589153	5.82989	-7.56294	4.34998e-13	3.95193e-12	18.9398	12.3615	down	WNT9A
APLNR	-0.586867	5.99604	-8.32803	2.54707e-15	2.96281e-14	23.9913	14.594	down	APLNR
ANKRD29	-0.586256	5.90466	-12.5423	1.51162e-29	9.70997e-28	56.354	28.8206	down	ANKRD29
PVR	0.586183	8.00372	11.7954	7.62548e-27	3.61509e-25	50.1931	26.1177	up	PVR
SAMD9L	-0.584993	7.12777	-12.0353	1.04817e-27	5.47988e-26	52.1572	26.9796	down	SAMD9L
