# Supplementary material for: Construction and analysis of a joint diagnosis model of random forest and artificial neural network for heart failure
Source: Aging (Albany NY). 2020 Dec 26;12(24):26221–35. doi: 10.18632/aging.202405 (PMC7803554; doi:10.18632/aging.202405)
Supplement: Supplementary File 2 [file aging-12-202405-s003.xlsx]

## Sheet: SupplementFiles2
Supplementary File 2. The GO enrichment results before and after deduplication.
category	ID	term	count	genes	logFC	adj_pval	zscore
BP	GO:0030198	extracellular matrix organization	89	FURIN	0.603446	1.04e-12	-0.953998
BP	GO:0003012	muscle system process	93	ATP1A1	0.518837	1.41e-08	-1.14065
BP	GO:0060047	heart contraction	65	ATP1A1	0.518837	2.53e-08	-0.620174
BP	GO:0042116	macrophage activation	33	IL1RL1	1.75892	2.98e-08	1.5667
BP	GO:0031589	cell-substrate adhesion	75	BCL6	0.718762	4.36e-08	0.11547
BP	GO:0051146	striated muscle cell differentiation	65	MYH6	1.57928	1.02e-07	-0.620174
BP	GO:0032103	positive regulation of response to external stimulus	69	IL1RL1	1.75892	1.37e-07	1.32424
BP	GO:1901342	regulation of vasculature development	83	JAK1	0.295341	1.37e-07	0.548821
BP	GO:0015711	organic anion transport	90	SLCO4A1	1.36131	2.97e-07	2.10819
BP	GO:0072593	reactive oxygen species metabolic process	59	STAT3	0.603744	3.92e-06	1.95283
BP	GO:0002237	response to molecule of bacterial origin	67	EDNRB	0.6923	4.85e-06	1.5882
BP	GO:0050900	leukocyte migration	88	EDNRB	0.6923	4.85e-06	1.066
BP	GO:0061448	connective tissue development	57	ACVRL1	0.439444	4.85e-06	-1.19208
BP	GO:0050673	epithelial cell proliferation	79	STAT3	0.603744	5.81e-06	-1.2376
BP	GO:1903555	regulation of tumor necrosis factor superfamily cytokine production	40	VSIR	0.426496	6.35e-06	2.21359
BP	GO:0048545	response to steroid hormone	72	ATP1A1	0.518837	7.47e-06	1.17851
BP	GO:0031099	regeneration	45	PTPRU	0.467279	9.77e-06	0.447214
BP	GO:0034341	response to interferon-gamma	45	JAK1	0.295341	1.07e-05	0.447214
BP	GO:0007162	negative regulation of cell adhesion	58	BCL6	0.718762	1.21e-05	0
BP	GO:0070661	leukocyte proliferation	59	BCL6	0.718762	1.34e-05	0.911322
BP	GO:0045785	positive regulation of cell adhesion	73	BCL6	0.718762	1.65e-05	0.585206
BP	GO:0070997	neuron death	65	STAT3	0.603744	2.54e-05	2.35666
BP	GO:0060537	muscle tissue development	73	ADAMTS9	1.17179	2.54e-05	-0.819288
BP	GO:0050727	regulation of inflammatory response	83	IL1RL1	1.75892	2.58e-05	2.08552
BP	GO:0072503	cellular divalent inorganic cation homeostasis	84	C1QTNF1	0.994155	2.58e-05	0.654654
BP	GO:0045926	negative regulation of growth	51	BCL6	0.718762	2.66e-05	0.140028
BP	GO:0001819	positive regulation of cytokine production	80	FURIN	0.603446	2.74e-05	1.56525
BP	GO:0055076	transition metal ion homeostasis	33	HMOX2	0.668352	2.96e-05	1.91485
BP	GO:1903035	negative regulation of response to wounding	26	C1QTNF1	0.994155	3.24e-05	1.56893
BP	GO:0006979	response to oxidative stress	78	HMOX2	0.668352	3.24e-05	2.49101
BP	GO:0050663	cytokine secretion	49	IL1RL1	1.75892	4.18e-05	1
BP	GO:0010959	regulation of metal ion transport	70	ATP1A1	0.518837	4.18e-05	-0.478091
BP	GO:1903034	regulation of response to wounding	40	C1QTNF1	0.994155	4.18e-05	0.948683
BP	GO:0051047	positive regulation of secretion	74	IL1RL1	1.75892	5.29e-05	0.232495
BP	GO:1901605	alpha-amino acid metabolic process	46	GNMT	0.675732	5.3e-05	0
BP	GO:0001503	ossification	70	PLXNB1	0.395401	5.48e-05	-0.478091
BP	GO:0002446	neutrophil mediated immunity	83	SERPINA3	2.63909	5.48e-05	4.71986
BP	GO:0002791	regulation of peptide secretion	83	IL1RL1	1.75892	5.81e-05	-0.548821
BP	GO:0035265	organ growth	43	MYH6	1.57928	7e-05	0.457496
BP	GO:0007568	aging	59	BCL6	0.718762	8.32e-05	2.73397
BP	GO:0007596	blood coagulation	61	ITPK1	0.412443	8.32e-05	1.15233
BP	GO:0045807	positive regulation of endocytosis	35	PPP3CC	0.326019	8.89e-05	1.18322
BP	GO:0007229	integrin-mediated signaling pathway	27	ADAM15	0.374372	9.3e-05	1.73205
BP	GO:0043406	positive regulation of MAP kinase activity	50	MAP3K6	0.52063	0.000103	-1.41421
BP	GO:0002683	negative regulation of immune system process	77	IL1RL1	1.75892	0.000107	1.93733
BP	GO:0048871	multicellular organismal homeostasis	79	SERPINA3	2.63909	0.000162	0.112509
BP	GO:0048661	positive regulation of smooth muscle cell proliferation	26	RBPMS2	0.431972	0.000174	0.784465
BP	GO:0042133	neurotransmitter metabolic process	34	POR	0.514963	0.0002	0.342997
BP	GO:0032612	interleukin-1 production	28	IL1R2	0.937467	0.000222	0.755929
BP	GO:0032102	negative regulation of response to external stimulus	63	SEMA4B	0.676457	0.000226	1.13389
BP	GO:0031667	response to nutrient levels	80	AQP3	0.960641	0.000226	1.78885
BP	GO:0002576	platelet degranulation	30	SERPINA3	2.63909	0.000226	1.82574
BP	GO:0060348	bone development	43	PLXNB1	0.395401	0.000235	-1.67748
BP	GO:0008217	regulation of blood pressure	38	ACVRL1	0.439444	0.000235	-1.94666
BP	GO:0001101	response to acid chemical	60	TEAD2	0.445692	0.000235	0.774597
BP	GO:0032956	regulation of actin cytoskeleton organization	60	NF2	0.431821	0.000235	-1.0328
BP	GO:0060759	regulation of response to cytokine stimulus	39	JAK1	0.295341	0.000265	0.480384
BP	GO:0007159	leukocyte cell-cell adhesion	59	BCL6	0.718762	0.000267	1.1717
BP	GO:0090287	regulation of cellular response to growth factor stimulus	53	ACVRL1	0.439444	0.00027	-1.51097
BP	GO:0001655	urogenital system development	58	NID1	0.596934	0.000272	0.525226
BP	GO:0098754	detoxification	30	GPX3	0.328072	0.000323	1.46059
BP	GO:0042391	regulation of membrane potential	71	BID	0.443556	0.00033	-1.0681
BP	GO:0010038	response to metal ion	62	AQP3	0.960641	0.000343	1.27
BP	GO:0044706	multi-multicellular organism process	43	DAZAP1	0.293562	0.000362	1.06749
BP	GO:0006520	cellular amino acid metabolic process	62	GGT5	0.830097	0.000393	0.254
BP	GO:0018212	peptidyl-tyrosine modification	62	JAK1	0.295341	0.000393	1.016
BP	GO:0048872	homeostasis of number of cells	46	BCL6	0.718762	0.000437	1.7693
BP	GO:0050920	regulation of chemotaxis	42	SEMA4B	0.676457	0.000439	-0.617213
BP	GO:0009612	response to mechanical stimulus	41	ATP1A1	0.518837	0.000439	-0.780869
BP	GO:0032355	response to estradiol	30	STAT3	0.603744	0.000446	0
BP	GO:0042110	T cell activation	74	BCL6	0.718762	0.000461	0.697486
BP	GO:0032963	collagen metabolic process	27	FURIN	0.603446	0.000487	-0.57735
BP	GO:0001505	regulation of neurotransmitter levels	60	LIN7A	0.42825	0.000494	0
BP	GO:0036293	response to decreased oxygen levels	62	HMOX2	0.668352	0.000505	1.778
BP	GO:0002931	response to ischemia	16	EIF4EBP1	0.413598	0.000513	0.5
BP	GO:0098739	import across plasma membrane	26	ATP1A1	0.518837	0.000576	1.1767
BP	GO:0009615	response to virus	56	FCN3	1.7869	0.000591	-1.33631
BP	GO:0006869	lipid transport	61	PITPNM1	0.467278	0.000592	2.17663
BP	GO:0046677	response to antibiotic	56	JAK1	0.295341	0.000638	1.33631
BP	GO:0048608	reproductive structure development	69	BCL2L1	0.480937	0.000714	1.32424
BP	GO:0034765	regulation of ion transmembrane transport	75	WNK3	0.717841	0.000869	-1.03923
BP	GO:2000107	negative regulation of leukocyte apoptotic process	15	BCL6	0.718762	0.000869	0.774597
BP	GO:0002573	myeloid leukocyte differentiation	39	THOC5	0.389914	0.000955	2.72218
BP	GO:0044282	small molecule catabolic process	70	LYVE1	1.43473	0.00101344	-1.43427
BP	GO:0030323	respiratory tube development	35	MAP2K1	0.541505	0.00102624	1.18322
BP	GO:0001889	liver development	29	IL10	0.396602	0.00110018	-0.185695
BP	GO:2000106	regulation of leukocyte apoptotic process	21	BCL6	0.718762	0.00110018	1.52753
BP	GO:0001818	negative regulation of cytokine production	51	FURIN	0.603446	0.0011022	1.82036
BP	GO:0002367	cytokine production involved in immune response	24	BCL6	0.718762	0.0011022	0.816497
BP	GO:0072511	divalent inorganic cation transport	75	SLC39A1	0.356563	0.00117951	-0.11547
BP	GO:0071604	transforming growth factor beta production	13	FURIN	0.603446	0.00120538	-0.83205
BP	GO:1901654	response to ketone	37	ELK1	0.344119	0.00127564	1.47959
BP	GO:0051048	negative regulation of secretion	43	WNK3	0.717841	0.00134664	0.457496
BP	GO:0050867	positive regulation of cell activation	63	IL1RL1	1.75892	0.00135276	2.64575
BP	GO:0014909	smooth muscle cell migration	22	PARVA	0.266417	0.00137605	-1.2792
BP	GO:0009410	response to xenobiotic stimulus	50	EIF4EBP1	0.413598	0.00140403	-1.9799
BP	GO:0033002	muscle cell proliferation	43	STAT3	0.603744	0.00145705	1.06749
BP	GO:0006575	cellular modified amino acid metabolic process	38	GGT5	0.830097	0.00146923	2.59554
BP	GO:0006631	fatty acid metabolic process	61	GGT5	0.830097	0.00189403	-0.128037
BP	GO:0097164	ammonium ion metabolic process	38	LPCAT3	0.597774	0.00196437	0.324443
BP	GO:0030100	regulation of endocytosis	48	PPP3CC	0.326019	0.00199662	2.02073
BP	GO:0048732	gland development	67	ZBTB7B	0.269629	0.00214694	0.122169
BP	GO:0031032	actomyosin structure organization	37	MYH6	1.57928	0.00220442	-2.13719
BP	GO:0050919	negative chemotaxis	14	SEMA4B	0.676457	0.00223038	-1.60357
BP	GO:0046579	positive regulation of Ras protein signal transduction	17	ADGRG1	0.468759	0.00254911	-1.21268
BP	GO:0048705	skeletal system morphogenesis	42	SLC39A1	0.356563	0.00269457	-1.23443
BP	GO:0006953	acute-phase response	14	SERPINA3	2.63909	0.00272159	3.20713
BP	GO:0042445	hormone metabolic process	41	FURIN	0.603446	0.00280717	-0.780869
BP	GO:0030099	myeloid cell differentiation	64	BCL6	0.718762	0.00307568	4
BP	GO:0001763	morphogenesis of a branching structure	36	TGFBR2	0.284359	0.00317851	0.666667
BP	GO:0002697	regulation of immune effector process	69	BCL6	0.718762	0.00318808	1.32424
BP	GO:0016485	protein processing	53	FURIN	0.603446	0.00328693	0.412082
BP	GO:0043434	response to peptide hormone	66	STAT3	0.603744	0.00370514	1.72328
BP	GO:0071214	cellular response to abiotic stimulus	53	ATP1A1	0.518837	0.00395488	0.412082
BP	GO:0034340	response to type I interferon	22	JAK1	0.295341	0.00400434	-0.852803
BP	GO:0006576	cellular biogenic amine metabolic process	15	AMD1	0.427147	0.00404749	-0.774597
BP	GO:0007178	transmembrane receptor protein serine/threonine kinase signaling pathway	55	FURIN	0.603446	0.00431565	-1.48324
BP	GO:0032147	activation of protein kinase activity	53	MAP3K6	0.52063	0.0043443	-0.686803
BP	GO:0071559	response to transforming growth factor beta	43	FURIN	0.603446	0.00479871	-1.37249
BP	GO:0032615	interleukin-12 production	15	IL10	0.396602	0.00481907	1.29099
BP	GO:1902105	regulation of leukocyte differentiation	45	BCL6	0.718762	0.00524705	2.53421
BP	GO:0042698	ovulation cycle	17	TIMP4	0.750153	0.00543578	-0.242536
BP	GO:0003231	cardiac ventricle development	26	MYH6	1.57928	0.00569334	-0.392232
BP	GO:0098883	synapse pruning	6	C1QB	0.707716	0.00569334	0.816497
BP	GO:0051770	positive regulation of nitric-oxide synthase biosynthetic process	7	NAMPT	0.584075	0.00574971	1.13389
BP	GO:0009308	amine metabolic process	27	AMD1	0.427147	0.00619125	-0.57735
BP	GO:0006790	sulfur compound metabolic process	57	GGT5	0.830097	0.00628239	0.927173
BP	GO:0014066	regulation of phosphatidylinositol 3-kinase signaling	25	PLXNB1	0.395401	0.00634343	-1.4
BP	GO:0006066	alcohol metabolic process	56	ITPK1	0.412443	0.00634625	0.534522
BP	GO:0010212	response to ionizing radiation	28	ELK1	0.344119	0.00736289	0.755929
BP	GO:0042737	drug catabolic process	27	GPX3	0.328072	0.0075488	-0.57735
BP	GO:0060191	regulation of lipase activity	21	FURIN	0.603446	0.00770627	-1.52753
BP	GO:0045444	fat cell differentiation	38	ZBTB7B	0.269629	0.00770627	0.648886
BP	GO:0000041	transition metal ion transport	23	SLC39A1	0.356563	0.00779362	1.4596
BP	GO:0045744	negative regulation of G protein-coupled receptor signaling pathway	14	ADA	0.309198	0.00782717	-1.60357
BP	GO:0051045	negative regulation of membrane protein ectodomain proteolysis	5	TIMP4	0.750153	0.00784932	0.447214
BP	GO:0019216	regulation of lipid metabolic process	61	SERPINA3	2.63909	0.0080285	1.40841
BP	GO:2000118	regulation of sodium-dependent phosphate transport	4	ATF4	0.44451	0.00848546	0
BP	GO:0003014	renal system process	24	AQP3	0.960641	0.00858025	-0.816497
BP	GO:0008277	regulation of G protein-coupled receptor signaling pathway	28	GSK3A	0.293295	0.00864047	-1.13389
BP	GO:0016053	organic acid biosynthetic process	67	GGT5	0.830097	0.00910622	1.5882
BP	GO:1902895	positive regulation of pri-miRNA transcription by RNA polymerase II	10	STAT3	0.603744	0.00920392	1.26491
BP	GO:0048638	regulation of developmental growth	53	SEMA4B	0.676457	0.00958307	0.137361
BP	GO:0042063	gliogenesis	46	STAT3	0.603744	0.00961763	0.294884
BP	GO:0035296	regulation of tube diameter	27	EDNRB	0.6923	0.00965496	-0.96225
CC	GO:0062023	collagen-containing extracellular matrix	107	SERPINA3	2.63909	1.05e-20	-2.99688
CC	GO:0005788	endoplasmic reticulum lumen	61	TSPAN14	0.348789	7.61e-06	0.128037
CC	GO:0005581	collagen trimer	23	FCN3	1.7869	0.000672	-1.04257
CC	GO:0009897	external side of plasma membrane	65	IL1RL1	1.75892	0.000672	-0.124035
CC	GO:0060205	cytoplasmic vesicle lumen	58	SERPINA3	2.63909	0.000672	2.36352
CC	GO:0005925	focal adhesion	66	FLII	0.384234	0.000733	1.96946
CC	GO:0010008	endosome membrane	71	FURIN	0.603446	0.00404508	2.49224
CC	GO:0005911	cell-cell junction	68	AQP3	0.960641	0.00539768	0.242536
CC	GO:0043025	neuronal cell body	72	NPTX2	0.856335	0.0065731	-0.707107
CC	GO:0044853	plasma membrane raft	23	ATP1A1	0.518837	0.00811549	1.04257
CC	GO:0044449	contractile fiber part	38	MYH6	1.57928	0.00811549	-0.973329
CC	GO:0031252	cell leading edge	60	FAM89B	0.359211	0.00926285	1.0328
CC	GO:0031253	cell projection membrane	53	NF2	0.431821	0.00929587	0.137361
MF	GO:0005178	integrin binding	39	ADAM15	0.374372	2.58e-07	-1.1209
MF	GO:0005539	glycosaminoglycan binding	54	LYVE1	1.43473	8.39e-07	-2.99382
MF	GO:0019955	cytokine binding	34	IL1RL1	1.75892	2.27e-05	1.37199
MF	GO:0050839	cell adhesion molecule binding	88	LAD1	0.669343	2.27e-05	0.852803
MF	GO:0019838	growth factor binding	35	FURIN	0.603446	3.6e-05	0.507093
MF	GO:0050662	coenzyme binding	54	DUS1L	0.334786	0.0011289	-1.08866
MF	GO:0050840	extracellular matrix binding	17	NID1	0.596934	0.00364603	1.69775
MF	GO:0001968	fibronectin binding	11	ITGA3	0.474427	0.00366321	-1.50756
MF	GO:0004896	cytokine receptor activity	23	IL1RL1	1.75892	0.00591873	1.04257
MF	GO:0042277	peptide binding	51	FURIN	0.603446	0.00692471	0.420084
MF	GO:0005518	collagen binding	18	C1QTNF1	0.994155	0.00697675	-1.88562
MF	GO:0043548	phosphatidylinositol 3-kinase binding	11	ATP1A1	0.518837	0.00789682	0.904534
MF	GO:0008081	phosphoric diester hydrolase activity	22	SMPD4	0.345367	0.00943072	-2.13201
