# Supplementary material for: Construction and analysis of a joint diagnosis model of random forest and artificial neural network for heart failure
Source: Aging (Albany NY). 2020 Dec 26;12(24):26221–35. doi: 10.18632/aging.202405 (PMC7803554; doi:10.18632/aging.202405)
Supplement: Supplementary File 3 [file aging-12-202405-s004.xlsx]

## Sheet: importance
Supplementary File 3. The importance output results of the random forest model.
	Disease	Normal	MeanDecreaseGini
SERPINA3	10.2515	9.69632	2.99765
HMOX2	11.2261	9.41239	3.544
FCN3	9.5833	8.599	2.62168
FURIN	8.61961	8.10563	2.40887
LAD1	11.8445	9.04955	2.48
LCN6	11.131	8.0652	2.73198
GGT5	7.87965	8.09365	1.91662
SLCO4A1	5.92695	6.79661	1.87267
CSDC2	10.8473	8.9862	3.29841
IL1RL1	6.43012	5.81009	1.08095
TUBA3E	7.39231	5.44888	1.10197
CD163	6.29595	5.55291	1.48398
NPTX2	6.19307	5.25852	1.26027
BCL6	6.08661	7.33068	1.24266
SEMA4B	6.82173	6.63087	1.4554
VSIG4	7.76342	5.67648	1.91031
STAT3	7.18022	4.58802	1.17097
ADAMTS9	5.90707	5.46925	0.749281
RNASE2	5.5023	6.24439	1.3485
AQP3	8.65195	5.2135	0.687084
TENT5B	6.60348	5.93142	0.649361
NT5DC2	7.14421	7.88219	0.839738
C1QTNF1	6.23938	5.25039	1.40528
INSYN1	9.64449	7.30928	1.63631
MYH6	2.82095	4.94185	0.640824
LYVE1	5.50985	5.94	1.06798
NID1	7.30548	4.61224	0.850697
TEAD4	4.70966	4.65422	1.16627
WNK3	6.94002	3.54551	0.778832
DUSP13	7.72552	6.53299	1.03705
ECRP	6.14891	3.04724	1.26537
ST6GALNAC3	5.46672	5.27622	0.83001
LPCAT3	3.56399	3.54908	0.638903
PLA2G2A	5.18413	3.84356	0.540446
PLP2	5.63599	1.84996	0.57651
SLC36A4	5.98617	4.4277	0.379497
ADAMTS4	4.70306	5.64687	0.660748
C1orf162	5.52393	4.99442	1.0829
KIAA0040	3.26765	4.18453	0.246555
MID1IP1	6.13941	5.018	0.677611
GNMT	7.96181	5.51855	0.501695
EDNRB	6.44795	4.0563	0.311626
ETNK2	6.88939	2.61082	0.419646
IL18R1	3.30753	4.17008	0.37145
OSMR	5.87125	4.0373	0.314768
MYOT	6.89659	1.99115	0.273506
ANPEP	4.13801	4.06945	0.503032
ALOX5AP	5.47139	3.85374	0.594599
METTL7B	3.1403	2.97525	0.294353
SLC2A1	5.8472	2.78848	0.379865
SIGLEC9	4.76582	3.6127	0.82892
PLIN2	5.21533	2.95943	0.335362
SLC11A1	2.26284	4.57529	0.331655
S100A9	1.8842	2.99171	0.197853
FCER1G	5.01675	5.50908	0.602069
SAMHD1	3.04943	5.3311	0.474485
MPP3	4.80552	5.13344	0.46656
FCGBP	6.39629	3.83585	0.562108
CNN1	4.37188	3.07841	0.197296
PVR	3.87911	4.00262	0.271202
HOPX	4.17755	1.63971	0.196981
ADAMTS15	3.6172	3.66882	0.308952
AOX1	3.61307	5.09691	0.334324
ANKRD2	5.90661	2.97311	0.319033
CYP4B1	7.09171	2.77448	0.374113
C1orf105	5.36375	4.26755	0.47001
CYP4Z1	5.84026	1.88247	0.204009
ALOX5	3.53869	5.17776	0.449223
LAPTM5	3.10113	4.47715	0.377977
FPR1	2.98688	4.01464	0.197807
ITGA5	2.94467	1.62274	0.256874
KLHL41	5.5304	3.74481	0.357333
TUBA1C	4.08766	0.986047	0.147981
RARRES1	6.40981	3.76399	0.329843
BLM	2.58652	2.64662	0.218083
ATP1B3	3.78273	2.97827	0.213838
CRISPLD2	4.6114	4.86564	0.164583
TIMP4	4.30708	5.71532	0.810481
CD38	4.33437	2.51306	0.210857
IL1R2	0.828412	3.87355	0.131414
SLC7A1	3.55991	2.55661	0.136523
CHDH	3.75517	4.08535	0.224566
SERPINB8	2.86732	2.46983	0.115158
GFPT2	1.75343	2.69199	0.107555
SLCO2A1	3.08557	4.46811	0.141559
ARRDC4	2.54937	0.982049	0.0741813
MT1X	3.42452	3.0926	0.169674
MIR208A	3.03328	2.83945	0.138401
CCR1	4.94455	3.12363	0.449966
SH3PXD2B	2.0143	3.08789	0.158861
SHISA3	3.45301	3.28003	0.267879
MGST1	0.898282	4.68668	0.239894
PLTP	4.31045	3.4119	0.177707
GPSM2	2.32933	4.15436	0.184145
SGPP2	3.94188	2.75421	0.182274
TIMP1	2.89702	1.48315	0.11016
GALNT15	5.33427	2.21144	0.203502
PI15	5.80959	3.61886	0.30515
MEDAG	2.70289	2.21795	0.0928916
CTSC	1.80984	2.5301	0.0925182
CD14	4.86838	1.90986	0.257618
SERPINE1	1.32799	2.42622	0.134041
MT1A	3.0429	5.40246	0.125284
PNP	1.72781	2.34953	0.0565844
F13A1	4.7637	2.40524	0.193884
TLR2	2.04293	2.88416	0.118001
CHRDL2	4.99013	1.20514	0.142915
IL1R1	3.10278	3.88506	0.146324
C1QB	2.804	3.69942	0.212741
SCGN	3.95455	2.48124	0.130356
AREG	0.556254	1.96144	0.093788
IFI30	2.41237	3.23765	0.196614
XRCC4	4.46224	1.45373	0.19332
S100A8	0.661201	0.894975	0.0768201
CD53	2.53979	3.25971	0.189598
LMCD1	3.57315	2.47341	0.130406
FAM83B	2.22375	2.40513	0.0990593
ARG2	2.17023	2.60483	0.0850869
CHL1	2.27217	2.87853	0.121549
ETNPPL	1.22755	2.04243	0.182351
C1QC	1.83202	2.4257	0.12445
MRC1	0.842278	1.0605	0.127714
HAS2	2.0876	1.45887	0.0786594
CPM	1.06535	3.79468	0.192041
LINC00312	4.55296	2.06929	0.133677
PTX3	1.35227	0.241098	0.0848218
THBS1	3.03871	1.62602	0.107382
CCL2	0.530829	3.31311	0.142194
SPP1	1.48821	1.21073	0.075509
FAM155B	3.90748	2.79044	0.116948
MT1M	-0.0676059	2.6139	0.0704477
C3	0.848774	-0.0803761	0.0932578
HMGCS2	2.8958	1.96064	0.0767478
CHI3L1	4.59668	1.0107	0.145966
AQP4	2.47735	0.918991	0.114829
TNC	2.75469	0.461946	0.0897272
FREM1	8.32072	8.46034	2.81924
MNS1	9.04367	7.67434	2.30747
SMOC2	8.73133	8.151	2.6757
ZMAT1	10.351	9.97203	3.14909
ECM2	8.58149	7.51036	2.44007
PDE5A	6.10188	5.1972	1.61883
LUM	8.31111	6.61196	2.16722
ASPN	7.37911	5.2121	1.27127
ITIH5	5.68114	6.06095	1.81424
FRZB	6.44084	5.83282	1.74834
NRK	5.3516	4.5382	0.953687
MATN2	7.54348	5.26586	1.59226
ISLR	7.81635	7.39641	1.77079
KCNN3	7.72079	5.71052	1.11937
FNDC1	6.15399	7.38867	1.11304
SDSL	7.10419	7.20887	1.50057
SCN2B	8.03443	6.63488	1.70028
PTN	7.27344	4.22817	1.26188
SFRP4	6.68901	5.88137	1.59822
CCDC113	7.59742	6.96915	1.31487
SLC16A9	8.69832	7.5704	1.67617
BTN3A1	7.53932	4.93884	0.935922
C1QTNF7	6.18893	7.83073	1.48217
OGN	8.10002	6.05177	1.59452
SCUBE2	7.16494	4.32535	1.09962
GLT8D2	5.78567	6.46228	1.12
IFI44L	5.55645	4.16365	0.809123
TLL2	5.84682	5.14742	0.64262
ANOS1	4.92428	3.50275	0.719364
PHLDA1	7.03778	4.83803	1.24383
ARRDC3	8.39226	6.95956	1.31322
GARNL3	3.49529	5.72755	0.725968
CREB5	9.17899	6.62742	1.09374
IFIT2	6.01074	5.81184	0.546597
PLEKHH2	2.81948	4.75009	0.461694
MME	5.4301	4.0733	1.09762
OLFML1	5.91193	1.64403	0.405147
FGF14	4.51945	3.51863	0.352275
ACKR4	4.63162	3.59839	0.277998
C16orf89	3.95574	4.11498	0.514868
ABCG2	6.70165	2.96275	0.721476
MFAP4	5.00382	4.45977	0.366685
CRISPLD1	4.4781	5.49025	1.23203
KLHL13	4.339	4.7138	0.437497
MYH10	5.09955	3.98025	0.272904
NAP1L3	3.85612	6.57335	0.714667
MXRA5	6.86583	2.39642	0.523473
LINC00670	5.78441	3.18716	0.275138
SLC6A1	2.94338	2.99207	0.417671
FZD7	3.2897	5.49522	0.256581
NT5E	5.92823	5.70114	0.596975
CRYM	2.88544	5.18154	0.301721
PLCE1	1.7589	4.60777	0.317797
EPHX2	4.81495	4.76707	0.30587
FMO4	3.89751	3.49365	0.238248
TMEM71	6.01746	3.39819	0.572616
HERC6	3.6459	4.28659	0.240493
ANKRD29	3.20723	2.8163	0.178446
FGF1	3.41519	2.58892	0.248165
LIPH	2.14177	5.19758	0.312161
SNCA	2.18312	4.7229	0.30952
DPT	4.36326	2.86197	0.294835
LRRC17	6.73092	4.32877	0.840934
SAMD9L	4.42714	5.0203	0.446618
SFRP1	2.55128	3.37522	0.197905
NTM	4.8352	4.75384	0.595667
PI16	2.49735	3.19101	0.285654
CCDC168	2.178	2.08795	0.313515
CTSK	4.46275	2.67011	0.362263
OGDHL	5.28632	3.72796	0.274542
SULF1	3.81002	5.23473	0.320659
PIK3IP1	4.52041	2.70512	0.187796
RSAD2	4.45992	2.11777	0.200225
DIO2	3.00944	4.89072	0.191775
SVEP1	4.31706	2.70061	0.284839
SESN3	2.74344	2.40042	0.120659
OMD	3.79658	0.38171	0.199589
RASL11B	2.97105	3.81639	0.189879
NPR3	1.58966	5.10449	0.139106
MAPK10	4.33256	2.47897	0.157545
IGSF10	3.0361	2.1854	0.150484
CCL5	8.0462	5.52192	0.495517
CGNL1	0.931111	1.46195	0.0667973
RGS4	2.58838	2.79259	0.124483
GSTM5	2.67514	4.16839	0.185051
GATM	2.01889	3.25561	0.159617
MOXD1	2.0055	1.89355	0.104005
MSS51	2.88528	2.94366	0.110095
ITGBL1	3.00762	3.65556	0.158634
HAPLN1	3.07581	2.9291	0.146348
NREP	4.4725	0.938021	0.134145
PODN	2.84293	1.49356	0.185821
ENAM	2.69431	4.50036	0.203651
BEX1	3.1557	4.46733	0.181865
LTBP2	3.78441	3.10439	0.148691
SAMD12	0.434994	1.86881	0.128626
DSC1	2.86663	2.0523	0.106632
PROM1	0.952399	2.29388	0.122264
FMOD	3.19076	2.07851	0.117345
THBS4	1.59332	1.95538	0.0800271
HBB	7.9047	2.33966	0.319745
ZNF676	1.48736	2.93373	0.0913191
RXRG	0.543006	1.85063	0.0451478
EDA2R	1.83681	4.98044	0.213142
C6	3.74036	3.76746	0.157804
C10orf71	2.585	0.968692	0.14146
NUDT7	1.99907	2.45186	0.100214
UCHL1	0.121766	2.83076	0.150006
CCDC3	2.79003	0.317283	0.0937031
STAT4	2.98925	3.16814	0.0977653
APLNR	2.41911	0.741761	0.0830157
LRRC10	2.04794	1.31192	0.0850244
PDE1A	1.50624	2.44385	0.11533
CCDC80	3.52336	1.71421	0.117361
HSPA2	-0.66325	0.872198	0.105772
SLC27A6	2.19362	1.30644	0.0937153
NPPA	1.19329	5.93095	0.213101
METTL21EP	1.67186	2.02516	0.101491
WNT9A	-0.0740856	1.94885	0.073211
GUCA1C	1.90072	-0.0145398	0.0549337
MYOC	1.65809	2.3268	0.111523
ATRNL1	0.697969	1.70403	0.0867275
ASB14	3.1752	1.44351	0.11633
FAP	1.43867	2.4871	0.0960738
EDIL3	2.75311	-0.378181	0.0964781
CHRDL1	3.04742	3.02862	0.123499
FBXO40	2.52986	-0.595835	0.0895751
DOK5	2.54058	0.791867	0.0712909
FLJ34503	-0.0408496	2.59215	0.0653184
POSTN	2.23858	-1.13683	0.086739
NEB	0.67939	1.43755	0.0860591
TTTY10	1.63576	1.38421	0.0854537
CXCL14	2.63991	3.0678	0.101463
USP9Y	1.62197	2.39428	0.129437
EGR1	1.01844	1.16622	0.076537
CXCL10	3.50951	3.37549	0.163619
SLN	0.735003	0.852278	0.0772932
TXLNGY	2.73494	0.478423	0.126453
RNU4.2	1.55119	0.247196	0.0684464
CD24	2.03298	0.871269	0.10682
EIF1AY	0.0568543	1.77339	0.0920583
UTY	0.743094	1.55938	0.0922481
KDM5D	2.55879	-0.562972	0.0710796
DDX3Y	0.854828	0.881878	0.0861348
RPS4Y1	2.47325	-0.885315	0.064705
