# Supplementary material for: Construction and analysis of a joint diagnosis model of random forest and artificial neural network for heart failure
Source: Aging (Albany NY). 2020 Dec 26;12(24):26221–35. doi: 10.18632/aging.202405 (PMC7803554; doi:10.18632/aging.202405)
Supplement: Supplementary File 4 [file aging-12-202405-s005.xlsx]

## Sheet: SuplementFiles4
Supplementary File 4. The output results of the neural network model.
	network output
error	4.88847
reached.threshold	0.00967474
steps	1423
Intercept.to.1layhid1	-1.3642
HMOX2.to.1layhid1	4.52737
CSDC2.to.1layhid1	-4.67078
ZMAT1.to.1layhid1	1.47859
SERPINA3.to.1layhid1	2.33252
FREM1.to.1layhid1	-4.52289
LCN6.to.1layhid1	1.94082
Intercept.to.1layhid2	0.28052
HMOX2.to.1layhid2	3.07302
CSDC2.to.1layhid2	-2.64652
ZMAT1.to.1layhid2	1.25047
SERPINA3.to.1layhid2	2.95277
FREM1.to.1layhid2	-6.31452
LCN6.to.1layhid2	0.421537
Intercept.to.1layhid3	0.440789
HMOX2.to.1layhid3	8.35153
CSDC2.to.1layhid3	-9.45829
ZMAT1.to.1layhid3	1.44093
SERPINA3.to.1layhid3	3.45808
FREM1.to.1layhid3	-6.41459
LCN6.to.1layhid3	1.54044
Intercept.to.1layhid4	-2.12051
HMOX2.to.1layhid4	-0.206265
CSDC2.to.1layhid4	0.539373
ZMAT1.to.1layhid4	0.937182
SERPINA3.to.1layhid4	3.73211
FREM1.to.1layhid4	-9.34869
LCN6.to.1layhid4	3.84875
Intercept.to.Normal	11.7855
1layhid1.to.Normal	-34.8641
1layhid2.to.Normal	-4.9828
1layhid3.to.Normal	-5.20033
1layhid4.to.Normal	-27.8344
Intercept.to.Disease	-12.1359
1layhid1.to.Disease	35.1289
1layhid2.to.Disease	4.91554
1layhid3.to.Disease	6.23243
1layhid4.to.Disease	29.374
